# Supplementary material for: Prognostic significance of SH2D5 expression in lung adenocarcinoma and its relation to immune cell infiltration
Source: PeerJ journal article supplement (doi:10.7717/peerj.15238), 2023-05-09
Supplement: PCR_data.zip [file microRNA-399-5P.xlsx]

## Sheet: Sheet1
Block Type	96-Well 0.2-mL Block
Calibration Background is expired	No
Calibration Background performed on	03-11-2022
Calibration Pure Dye ABY is expired	No
Calibration Pure Dye ABY performed on	03-11-2022
Calibration Pure Dye CY5 is expired	No
Calibration Pure Dye CY5 performed on	03-11-2022
Calibration Pure Dye FAM is expired	No
Calibration Pure Dye FAM performed on	03-11-2022
Calibration Pure Dye JUN is expired	No
Calibration Pure Dye JUN performed on	03-11-2022
Calibration Pure Dye MUSTANG PURPLE is expired	No
Calibration Pure Dye MUSTANG PURPLE performed on	03-11-2022
Calibration Pure Dye NED is expired	No
Calibration Pure Dye NED performed on	03-11-2022
Calibration Pure Dye ROX is expired	No
Calibration Pure Dye ROX performed on	03-11-2022
Calibration Pure Dye SYBR is expired	No
Calibration Pure Dye SYBR performed on	03-11-2022
Calibration Pure Dye TAMRA is expired	No
Calibration Pure Dye TAMRA performed on	03-11-2022
Calibration Pure Dye VIC is expired	No
Calibration Pure Dye VIC performed on	03-11-2022
Calibration ROI is expired	No
Calibration ROI performed on	03-11-2022
Calibration Uniformity is expired	No
Calibration Uniformity performed on	03-11-2022
Chemistry	SYBR_GREEN
Date Created	2022-11-25 14:57:40 PM CST
Experiment Barcode
Experiment File Name	D:\data\LXQ\2022-11-25.eds
Experiment Name	2022-11-25
Experiment Run End Time	2022-11-25 13:16:47 PM CST
Experiment Type	Comparative Cт (ΔΔCт)
Instrument Name	2765219080264
Instrument Serial Number	2765219080264
Instrument Type	QuantStudio™ 5 System
Passive Reference
Post-read Stage/Step
Pre-read Stage/Step
Quantification Cycle Method	Ct
Signal Smoothing On	true
Stage where Melt Analysis is performed	Stage3
Stage/ Cycle where Ct Analysis is performed	Stage2, Step2
Well	Well Position	Omit	Sample Name	Target Name	Task	Reporter	Quencher	Quantity	Quantity Mean	Quantity SD	RQ	RQ Min	RQ Max	CT	Ct Mean	Ct SD	Delta Ct	Delta Ct Mean	Delta Ct SD	Delta Ct SE	Delta Delta Ct	Automatic Ct Threshold	Ct Threshold	Automatic Baseline	Baseline Start	Baseline End	Amp Status	Comments	Cq Conf	CQCONF	EXPFAIL	MTP	OUTLIERRG	Tm1	Tm2	Tm3	Tm4
1	A1	false	BEAS-2B	b-actin	UNKNOWN	SYBR	None				1	0.876771	1.14055	14.0586	14.2916	0.13445		-7.71063	0.233743	0.0870784	0	true	57453.8	true	3	9	Inconclusive		0.927269	N	N	N	N	87.5272
2	A2	false	BEAS-2B	b-actin	UNKNOWN	SYBR	None				1	0.876771	1.14055	14.2843	14.2916	0.13445		-7.71063	0.233743	0.0870784	0	true	57453.8	true	3	9	Inconclusive		0.931766	N	N	N	N	87.38
3	A3	false	BEAS-2B	b-actin	UNKNOWN	SYBR	None				1	0.876771	1.14055	14.26	14.2916	0.13445		-7.71063	0.233743	0.0870784	0	true	57453.8	true	3	9	Inconclusive		0.978254	N	N	N	N	87.5272
4	A4	false	H1299	b-actin	UNKNOWN	SYBR	None				2.68926	2.26042	3.19946	14.3375	14.2959	0.265831		-9.13784	0.292893	0.116007	-1.42721	true	57453.8	true	3	9	Inconclusive		0.933579	N	N	N	N	87.2328
5	A5	false	H1299	b-actin	UNKNOWN	SYBR	None				2.68926	2.26042	3.19946	14.3264	14.2959	0.265831		-9.13784	0.292893	0.116007	-1.42721	true	57453.8	true	3	9	Inconclusive		0.956974	N	N	N	N	87.38
6	A6	false	H1299	b-actin	UNKNOWN	SYBR	None				2.68926	2.26042	3.19946	13.8955	14.2959	0.265831		-9.13784	0.292893	0.116007	-1.42721	true	57453.8	true	3	9	Inconclusive		0.924463	N	N	N	N	87.2328
13	B1	false	BEAS-2B	b-actin	UNKNOWN	SYBR	None				1	0.876771	1.14055	14.3022	14.2916	0.13445		-7.71063	0.233743	0.0870784	0	true	57453.8	true	3	9	Inconclusive		0.943475	N	N	N	N	87.38
14	B2	false	BEAS-2B	b-actin	UNKNOWN	SYBR	None				1	0.876771	1.14055	14.4033	14.2916	0.13445		-7.71063	0.233743	0.0870784	0	true	57453.8	true	3	9	Inconclusive		0.93691	N	N	N	N	87.2328
15	B3	false	BEAS-2B	b-actin	UNKNOWN	SYBR	None				1	0.876771	1.14055	14.4414	14.2916	0.13445		-7.71063	0.233743	0.0870784	0	true	57453.8	true	3	9	Inconclusive		0.930772	N	N	N	N	87.2328
16	B4	false	H1299	b-actin	UNKNOWN	SYBR	None				2.68926	2.26042	3.19946	14.4229	14.2959	0.265831		-9.13784	0.292893	0.116007	-1.42721	true	57453.8	true	3	9	Inconclusive		0.951046	N	N	N	N	87.2328
17	B5	false	H1299	b-actin	UNKNOWN	SYBR	None				2.68926	2.26042	3.19946	14.6739	14.2959	0.265831		-9.13784	0.292893	0.116007	-1.42721	true	57453.8	true	3	9	Inconclusive		0.952948	N	N	N	N	87.38
18	B6	false	H1299	b-actin	UNKNOWN	SYBR	None				2.68926	2.26042	3.19946	14.119	14.2959	0.265831		-9.13784	0.292893	0.116007	-1.42721	true	57453.8	true	3	9	Inconclusive		0.943678	N	N	N	N	87.2328
61	F1	false	BEAS-2B	micro-339-5p	UNKNOWN	SYBR	None							21.914	22.0023	0.191204						true	57033	true	3	16	Amp		0.832564	N	N	N	N	88.7048
62	F2	false	BEAS-2B	micro-339-5p	UNKNOWN	SYBR	None							22.008	22.0023	0.191204						true	57033	true	3	17	Amp		0.846173	N	N	N	N	88.5576
63	F3	false	BEAS-2B	micro-339-5p	UNKNOWN	SYBR	None							21.9597	22.0023	0.191204						true	57033	true	3	16	Amp		0.840998	N	N	N	N	88.5576
64	F4	false	H1299	micro-339-5p	UNKNOWN	SYBR	None							23.5336	23.4337	0.122966						true	57033	true	3	18	Amp		0.814664	N	N	N	N	88.7048
65	F5	false	H1299	micro-339-5p	UNKNOWN	SYBR	None							23.3733	23.4337	0.122966						true	57033	true	3	18	Amp		0.807629	N	N	N	N	88.7048
66	F6	false	H1299	micro-339-5p	UNKNOWN	SYBR	None							23.4816	23.4337	0.122966						true	57033	true	3	18	Amp		0.800471	N	N	N	N	88.7048
73	G1	false	BEAS-2B	micro-339-5p	UNKNOWN	SYBR	None							22.4176	22.0023	0.191204						true	57033	true	3	17	Amp		0.836431	N	N	N	Y	88.7048
74	G2	false	BEAS-2B	micro-339-5p	UNKNOWN	SYBR	None							22.0194	22.0023	0.191204						true	57033	true	3	17	Amp		0.851557	N	N	N	N	88.5576
75	G3	false	BEAS-2B	micro-339-5p	UNKNOWN	SYBR	None							22.067	22.0023	0.191204						true	57033	true	3	16	Amp		0.849366	N	N	N	N	88.7048
76	G4	false	H1299	micro-339-5p	UNKNOWN	SYBR	None							23.5851	23.4337	0.122966						true	57033	true	3	18	Amp		0.82023	N	N	N	N	88.7048
77	G5	false	H1299	micro-339-5p	UNKNOWN	SYBR	None							23.3418	23.4337	0.122966						true	57033	true	3	18	Amp		0.806208	N	N	N	N	88.7048
78	G6	false	H1299	micro-339-5p	UNKNOWN	SYBR	None							23.4431	23.4337	0.122966						true	57033	true	3	18	Amp		0.829661	N	N	N	N	88.5576
85	H1	false	BEAS-2B	micro-339-5p	UNKNOWN	SYBR	None							21.8104	22.0023	0.191204						true	57033	true	3	16	Amp		0.848742	N	N	N	N	88.7048
86	H2	false	BEAS-2B	micro-339-5p	UNKNOWN	SYBR	None							21.8221	22.0023	0.191204						true	57033	true	3	17	Amp		0.911048	N	N	N	N	88.9992
87	H3	false	BEAS-2B	micro-339-5p	UNKNOWN	SYBR	None								22.0023	0.191204						true	57033	true	3	30	No Amp		0	Y	N	N	N	60.001
88	H4	false	H1299	micro-339-5p	UNKNOWN	SYBR	None							23.5	23.4337	0.122966						true	57033	true	3	18	Amp		0.822811	N	N	N	N	88.7048
89	H5	false	H1299	micro-339-5p	UNKNOWN	SYBR	None							23.1734	23.4337	0.122966						true	57033	true	3	18	Amp		0.810321	N	N	N	N	88.7048
90	H6	false	H1299	micro-339-5p	UNKNOWN	SYBR	None							23.4715	23.4337	0.122966						true	57033	true	3	18	Amp		0.796775	Y	N	N	N	88.7048
Analysis Type	Singleplex
Endogenous Control	micro-339-5p
RQ Min/Max Confidence Level	95.0
Reference Sample	BEAS-2B
