# Supplementary material for: Prognostic significance of SH2D5 expression in lung adenocarcinoma and its relation to immune cell infiltration
Source: PeerJ journal article supplement (doi:10.7717/peerj.15238), 2023-05-09
Supplement: PCR_data.zip [file SH2D5 PCR.xlsx]

## Sheet: Sheet1
Block Type	96-Well 0.2-mL Block
Calibration Background is expired	No
Calibration Background performed on	03-11-2022
Calibration Pure Dye ABY is expired	No
Calibration Pure Dye ABY performed on	03-11-2022
Calibration Pure Dye CY5 is expired	No
Calibration Pure Dye CY5 performed on	03-11-2022
Calibration Pure Dye FAM is expired	No
Calibration Pure Dye FAM performed on	03-11-2022
Calibration Pure Dye JUN is expired	No
Calibration Pure Dye JUN performed on	03-11-2022
Calibration Pure Dye MUSTANG PURPLE is expired	No
Calibration Pure Dye MUSTANG PURPLE performed on	03-11-2022
Calibration Pure Dye NED is expired	No
Calibration Pure Dye NED performed on	03-11-2022
Calibration Pure Dye ROX is expired	No
Calibration Pure Dye ROX performed on	03-11-2022
Calibration Pure Dye SYBR is expired	No
Calibration Pure Dye SYBR performed on	03-11-2022
Calibration Pure Dye TAMRA is expired	No
Calibration Pure Dye TAMRA performed on	03-11-2022
Calibration Pure Dye VIC is expired	No
Calibration Pure Dye VIC performed on	03-11-2022
Calibration ROI is expired	No
Calibration ROI performed on	03-11-2022
Calibration Uniformity is expired	No
Calibration Uniformity performed on	03-11-2022
Chemistry	SYBR_GREEN
Date Created	2022-11-22 15:34:06 PM CST
Experiment Barcode
Experiment Comment
Experiment File Name	D:\data\LXQ\2022-11-22.eds
Experiment Name	2022-11-22
Experiment Run End Time	2022-11-22 14:27:45 PM CST
Experiment Type	Comparative Cт (ΔΔCт)
Instrument Name	2765219080264
Instrument Serial Number	2765219080264
Instrument Type	QuantStudio™ 5 System
Passive Reference
Post-read Stage/Step
Pre-read Stage/Step
Quantification Cycle Method	Ct
Signal Smoothing On	true
Stage where Melt Analysis is performed	Stage3
Stage/ Cycle where Ct Analysis is performed	Stage2, Step2
User Name
Well	Well Position	Omit	Sample Name	Target Name	Task	Reporter	Quencher	Quantity	Quantity Mean	Quantity SD	RQ	RQ Min	RQ Max	CT	Ct Mean	Ct SD	Delta Ct	Delta Ct Mean	Delta Ct SD	Delta Ct SE	Delta Delta Ct	Automatic Ct Threshold	Ct Threshold	Automatic Baseline	Baseline Start	Baseline End	Amp Status	Comments	Cq Conf	OUTLIERRG	MTP	Tm1	Tm2	Tm3	Tm4
1	A1	FALSE	BEAS-2B	b-actin	UNKNOWN	SYBR	None				1	0.816364	1.22494	16.1275	16.2507	0.151806		-6.53712	0.392049	0.135493	0	TRUE	82278.8	TRUE	3	9	Inconclusive		0.962321	N	N	87.4542
2	A2	FALSE	BEAS-2B	b-actin	UNKNOWN	SYBR	None				1	0.816364	1.22494	16.025	16.2507	0.151806		-6.53712	0.392049	0.135493	0	TRUE	82278.8	TRUE	3	9	Inconclusive		0.966083	N	N	87.4542
3	A3	FALSE	BEAS-2B	b-actin	UNKNOWN	SYBR	None				1	0.816364	1.22494	16.3208	16.2507	0.151806		-6.53712	0.392049	0.135493	0	TRUE	82278.8	TRUE	3	9	Inconclusive		0.972331	N	N	87.3082
4	A4	FALSE	A549	b-actin	UNKNOWN	SYBR	None				2.63382	1.89964	3.65174	17.0744	17.4098	0.46735		-7.93427	0.565121	0.218217	-1.39716	TRUE	82278.8	TRUE	3	9	Inconclusive		0.971356	N	N	87.3082
5	A5	FALSE	A549	b-actin	UNKNOWN	SYBR	None				2.63382	1.89964	3.65174	17.8211	17.4098	0.46735		-7.93427	0.565121	0.218217	-1.39716	TRUE	82278.8	TRUE	3	9	Inconclusive		0.980926	N	N	87.3082
6	A6	FALSE	A549	b-actin	UNKNOWN	SYBR	None				2.63382	1.89964	3.65174	17.0919	17.4098	0.46735		-7.93427	0.565121	0.218217	-1.39716	TRUE	82278.8	TRUE	3	10	Inconclusive		0.971348	N	N	87.3082
7	A7	FALSE	H1299	b-actin	UNKNOWN	SYBR	None				0.457753	0.358068	0.58519	19.3939	18.9527	0.275351		-5.40976	0.451889	0.164016	1.12736	TRUE	82278.8	TRUE	3	11	Inconclusive		0.976996	N	N	87.4542
8	A8	FALSE	H1299	b-actin	UNKNOWN	SYBR	None				0.457753	0.358068	0.58519	18.6589	18.9527	0.275351		-5.40976	0.451889	0.164016	1.12736	TRUE	82278.8	TRUE	3	11	Inconclusive		0.977036	N	N	87.4542
9	A9	FALSE	H1299	b-actin	UNKNOWN	SYBR	None				0.457753	0.358068	0.58519	18.8398	18.9527	0.275351		-5.40976	0.451889	0.164016	1.12736	TRUE	82278.8	TRUE	3	10	Inconclusive		0.982652	N	N	87.1622
13	B1	FALSE	BEAS-2B	b-actin	UNKNOWN	SYBR	None				1	0.816364	1.22494	16.3585	16.2507	0.151806		-6.53712	0.392049	0.135493	0	TRUE	82278.8	TRUE	3	8	Inconclusive		0.969895	N	N	87.4542
14	B2	FALSE	BEAS-2B	b-actin	UNKNOWN	SYBR	None				1	0.816364	1.22494	16.2416	16.2507	0.151806		-6.53712	0.392049	0.135493	0	TRUE	82278.8	TRUE	3	9	Inconclusive		0.967334	N	N	87.3082
15	B3	FALSE	BEAS-2B	b-actin	UNKNOWN	SYBR	None				1	0.816364	1.22494	16.4309	16.2507	0.151806		-6.53712	0.392049	0.135493	0	TRUE	82278.8	TRUE	3	8	Inconclusive		0.981146	N	N	87.3082
16	B4	FALSE	A549	b-actin	UNKNOWN	SYBR	None				2.63382	1.89964	3.65174	17.16	17.4098	0.46735		-7.93427	0.565121	0.218217	-1.39716	TRUE	82278.8	TRUE	3	9	Inconclusive		0.971775	N	N	87.3082
17	B5	FALSE	A549	b-actin	UNKNOWN	SYBR	None				2.63382	1.89964	3.65174	18.1685	17.4098	0.46735		-7.93427	0.565121	0.218217	-1.39716	TRUE	82278.8	TRUE	3	9	Inconclusive		0.972461	N	N	87.3082
18	B6	FALSE	A549	b-actin	UNKNOWN	SYBR	None				2.63382	1.89964	3.65174	17.1428	17.4098	0.46735		-7.93427	0.565121	0.218217	-1.39716	TRUE	82278.8	TRUE	3	9	Inconclusive		0.976424	N	N	87.3082
19	B7	FALSE	H1299	b-actin	UNKNOWN	SYBR	None				0.457753	0.358068	0.58519	19.1683	18.9527	0.275351		-5.40976	0.451889	0.164016	1.12736	TRUE	82278.8	TRUE	3	11	Inconclusive		0.980136	N	N	87.3082
20	B8	FALSE	H1299	b-actin	UNKNOWN	SYBR	None				0.457753	0.358068	0.58519	18.7658	18.9527	0.275351		-5.40976	0.451889	0.164016	1.12736	TRUE	82278.8	TRUE	3	11	Inconclusive		0.985386	N	N	87.3082
21	B9	FALSE	H1299	b-actin	UNKNOWN	SYBR	None				0.457753	0.358068	0.58519	18.8898	18.9527	0.275351		-5.40976	0.451889	0.164016	1.12736	TRUE	82278.8	TRUE	3	10	Inconclusive		0.989757	N	N	87.0161
25	C1	FALSE	BEAS-2B	SH2D5	UNKNOWN	SYBR	None							23.0637	22.7878	0.361466						TRUE	72924.8	TRUE	3	16	Amp		0.972824	N	N	88.9145
26	C2	FALSE	BEAS-2B	SH2D5	UNKNOWN	SYBR	None							22.5852	22.7878	0.361466						TRUE	72924.8	TRUE	3	14	Amp		0.983241	N	N	88.7685
27	C3	FALSE	BEAS-2B	SH2D5	UNKNOWN	SYBR	None							23.5089	22.7878	0.361466						TRUE	72924.8	TRUE	3	15	Amp		0.979503	N	N	88.7685
28	C4	FALSE	A549	SH2D5	UNKNOWN	SYBR	None							25.2006	25.344	0.317719						TRUE	72924.8	TRUE	3	17	Amp		0.985149	N	N	88.7685
29	C5	FALSE	A549	SH2D5	UNKNOWN	SYBR	None							26.0588	25.344	0.317719						TRUE	72924.8	TRUE	3	16	Amp		0.982408	Y	N	88.9145
30	C6	FALSE	A549	SH2D5	UNKNOWN	SYBR	None							25.2762	25.344	0.317719						TRUE	72924.8	TRUE	3	15	Amp		0.99077	N	N	88.7685
31	C7	FALSE	H1299	SH2D5	UNKNOWN	SYBR	None							24.433	24.3625	0.358309						TRUE	72924.8	TRUE	3	15	Amp		0.989101	N	N	88.9145
32	C8	FALSE	H1299	SH2D5	UNKNOWN	SYBR	None							24.0094	24.3625	0.358309						TRUE	72924.8	TRUE	3	16	Amp		0.984723	N	N	88.9145
33	C9	FALSE	H1299	SH2D5	UNKNOWN	SYBR	None							24.5507	24.3625	0.358309						TRUE	72924.8	TRUE	3	16	Amp		0.988115	N	N	88.6225
37	D1	FALSE	BEAS-2B	SH2D5	UNKNOWN	SYBR	None							22.8217	22.7878	0.361466						TRUE	72924.8	TRUE	3	16	Amp		0.98166	N	N	88.9145
38	D2	FALSE	BEAS-2B	SH2D5	UNKNOWN	SYBR	None							22.4451	22.7878	0.361466						TRUE	72924.8	TRUE	3	15	Amp		0.984559	N	N	88.7685
39	D3	FALSE	BEAS-2B	SH2D5	UNKNOWN	SYBR	None							22.9592	22.7878	0.361466						TRUE	72924.8	TRUE	3	13	Amp		0.985515	N	N	88.7685
40	D4	FALSE	A549	SH2D5	UNKNOWN	SYBR	None							25.1526	25.344	0.317719						TRUE	72924.8	TRUE	3	15	Amp		0.984813	N	N	88.7685
41	D5	FALSE	A549	SH2D5	UNKNOWN	SYBR	None							25.4431	25.344	0.317719						TRUE	72924.8	TRUE	3	17	Amp		0.987383	N	N	88.7685
42	D6	FALSE	A549	SH2D5	UNKNOWN	SYBR	None							25.4518	25.344	0.317719						TRUE	72924.8	TRUE	3	14	Amp		0.984911	N	N	88.6225
43	D7	FALSE	H1299	SH2D5	UNKNOWN	SYBR	None							24.9607	24.3625	0.358309						TRUE	72924.8	TRUE	3	16	Amp		0.989363	N	N	88.7685
44	D8	FALSE	H1299	SH2D5	UNKNOWN	SYBR	None							24.0271	24.3625	0.358309						TRUE	72924.8	TRUE	3	15	Amp		0.989708	N	N	88.9145
45	D9	FALSE	H1299	SH2D5	UNKNOWN	SYBR	None							24.1733	24.3625	0.358309						TRUE	72924.8	TRUE	3	15	Amp		0.990013	N	N	88.6225
49	E1	FALSE	BEAS-2B	SH2D5	UNKNOWN	SYBR	None							22.5989	22.7878	0.361466						TRUE	72924.8	TRUE	3	15	Amp		0.981439	N	N	88.7685
50	E2	FALSE	BEAS-2B	SH2D5	UNKNOWN	SYBR	None							22.3142	22.7878	0.361466						TRUE	72924.8	TRUE	3	16	Amp		0.982575	N	N	88.6225
51	E3	FALSE	BEAS-2B	SH2D5	UNKNOWN	SYBR	None							22.7936	22.7878	0.361466						TRUE	72924.8	TRUE	3	14	Amp		0.982918	N	N	88.6225
52	E4	FALSE	A549	SH2D5	UNKNOWN	SYBR	None							25.1852	25.344	0.317719						TRUE	72924.8	TRUE	3	18	Amp		0.986324	N	N	88.6225
53	E5	FALSE	A549	SH2D5	UNKNOWN	SYBR	None							25.4124	25.344	0.317719						TRUE	72924.8	TRUE	3	16	Amp		0.987251	N	N	88.6225
54	E6	FALSE	A549	SH2D5	UNKNOWN	SYBR	None							24.9157	25.344	0.317719						TRUE	72924.8	TRUE	3	17	Amp		0.987888	N	N	88.6225
55	E7	FALSE	H1299	SH2D5	UNKNOWN	SYBR	None							24.8057	24.3625	0.358309						TRUE	72924.8	TRUE	3	16	Amp		0.989083	N	N	88.7685
56	E8	FALSE	H1299	SH2D5	UNKNOWN	SYBR	None							23.9639	24.3625	0.358309						TRUE	72924.8	TRUE	3	17	Amp		0.989072	N	N	88.7685
57	E9	FALSE	H1299	SH2D5	UNKNOWN	SYBR	None							24.3387	24.3625	0.358309						TRUE	72924.8	TRUE	3	17	Amp		0.989202	N	N	88.4764
Analysis Type	Singleplex
Endogenous Control	SH2D5
RQ Min/Max Confidence Level	95.0
Reference Sample	BEAS-2B
